# Supplementary material for: Severe Obesity, Psychopathologies, and Gut Microbiota: Insights into Bariatric Surgery Outcomes
Source: Research Square preprint supplement (doi:10.21203/rs.3.rs-6904293/v1), 2025-07-18
Supplement: Supplementary file 1 [file 63a132bf0fae4a6524c9f09d.docx]

**Table 2 : Clinical differences between weight-loss clusters at baseline (n=89)**

| **Clinical Variables** | **Units/factors** | **Weight-loss Clusters** | | **Pvalue** |
| --- | --- | --- | --- | --- |
| **A** | **B** |
| **Gender** | Female, n (%) | 47 (83.9%) | 21 (63.6%) | ns |
| Male, n (%) | 9 (16.1%) | 12 (36.4%) |
| **Age** | Years [IQR] | 48.0 [40.8;55.2] | 54.0 [50.0;61.0] | ns |
| **Surgery** | RYGB, n (%) | 40 (71.4%) | 14 (42.4%) | * |
| SG, n (%) | 16 (28.6%) | 19 (57.6%) |
| **Anthropometrics** | | | | |
| **Weight** | Kg [IQR] | 115 [103;134] | 117 [106;134] | ns |
| **BMI** | Kg/m2 [IQR] | 42.9 [39.0;46.8] | 42.9 [38.4;47.3] | ns |
| **Fat mass** | % [IQR] | 48.3 [45.3;51.4] | 46.3 [42.2;49.1] | * |
| **Fat -free mass** | % [IQR] | 49.3 [46.2;52.2] | 51.7 [48.2;55.6] | * |
| **Glucose homeostasis variables** | | | | |
| **Glycaemic profile** | Normal glucose profile, n (%) | 12 (21.4%) | 4 (12.1%) | ns |
| Glucose intolerance, n (%) | 19 (33.9%) | 12 (36.4%) |
| Type 2 Diabetes, n (%) | 25 (44.6%) | 17 (51.5%) |
| **Type 2 diabetes** | Yes, n (%) | 25 (44.6%) | 17 (51.5%) | ns |
| No, n (%) | 31 (55.4%) | 16 (48.5%) |
| **Metformin treatment** | Yes, n (%) | 39 (69.6%) | 22 (66.7%) | ns |
| No, n (%) | 17 (30.4%) | 11 (33.3%) |
| **Antidiabetic treatment (n)** | mean (±SD) | 0.69 (±1.17) | 0.72 (±1.18) | ns |
| **Glycemia** | mmol/l [IQR] | 5.80 [5.20;6.60] | 5.80 [5.30;7.20] | ns |
| **HbA1C** | % [IQR] | 6.00 [5.60;6.62] | 6.20 [5.90;7.00] | ns |
| **Fasting insulin** | mUI/l [IQR] | 15.50 [11.9;25.5] | 17.6 [11.6;22.0] | ns |
| **Lipid homeostasis variables** | | | | |
| **Dyslipidaemia** | No, n (%) | 11 (19.6%) | 6 (18.2%) | ns |
| Yes, n (%) | 45 (80.4%) | 27 (81.8%) |
| **Statins** | No, n (%) | 42 (75.0%) | 21 (63.6%) | ns |
| Yes, n (%) | 14 (25.0%) | 12 (36.4%) |
| **Total cholesterol** | mmol/l [IQR] | 4.54 [4.02;5.46] | 4.57 [3.78;5.18] | ns |
| **Triglycerides** | mmol/l [IQR] | 1.40 [1.06;2.06] | 1.49 [1.06;2.15] | ns |
| **HDL-cholesterol** | mmol/l [IQR] | 1.17 [0.89;1.35] | 1.17 [0.98;1.32] | ns |
| **LDL-cholesterol** | mmol/l [IQR] | 2.82 [2.26;3.52] | 2.90 [2.01;3.23] | ns |
| **Adipokines** | | | | |
| **Adiponectin** | µg/ml [IQR] | 3.35 [2.70;4.48] | 3.40 [2.88;5.23] | ns |
| **Leptin** | mg/ml [IQR] | 58.00 [45.0;80.2] | 56.0 [35.1;81.2] | ns |
| **CRP** | mg/L [IQR] | 6.00 [3.72;13.0] | 6.22 [4.30;11.0] | ns |
| **IL6** | pg/ml [IQR] | 4.00 [2.50;5.43] | 4.40 [3.10;5.40] | ns |
| **Comorbidities** | | | | |
| **Hypertension** | No, n (%) | 29 (51.8%) | 6 (18.2%) | ** |
| Yes, n (%) | 27 (48.2%) | 27 (81.8%) |
| **Anti-hypertensive treatment (n)** | mean (±SD) | 1.09 (±1.56) | 1.42 (±1.06) | * |
| **OSA** | No, n (%) | 13 (23.2%) | 5 (15.6%) | ns |
| Yes, n (%) | 43 (76.8%) | 27 (84.4%) |
| **CPAP** | No, n (%) | 34 (63.0%) | 14 (42.4%) | ns |
| Yes, n (%) | 20 (37.0%) | 19 (57.6%) |
| **Psychological assessment** | | | | |
| **Reported ACEs** | No, n (%) | 34 (60.7%) | 28 (84.8%) | * |
| Yes, n (%) | 22 (39.3%) | 5 (15.2%) |
| **Depression** | No, n (%) | 28 (50.0%) | 22 (66.7%) | ns |
| Symp., n (%) | 21 (37.5%) | 6 (18.2%) |
| Yes, n (%) | 7 (12.5%) | 5 (15.2%) |
| **Compulsive eating** | No, n (%) | 46 (82.1%) | 25 (75.8%) | ns |
| Yes, n (%) | 10 (17.9%) | 8 (24.2%) |

For quantitative variables, the Kruskal-Wallis or ANOVA tests were used, depending on the distribution of the variable. For qualitative variables, the Chi 2 test was used. RYGB Roux-en-Y Gastric Bypass, SG: sleeve gastrectomy, BMI: Body Mass Index. OSA: Obstructive Sleep Apnea, CPAP: Continuous Positive Airway Pressure, IQR: Interquartile Range, ACEs: Adverse Childhood Experiences, * P-value ≤ 0.05, ** P-value ≤ 0.01.
