# Supplementary material for: Severe Obesity, Psychopathologies, and Gut Microbiota: Insights into Bariatric Surgery Outcomes
Source: Research Square preprint supplement (doi:10.21203/rs.3.rs-6904293/v1), 2025-07-18
Supplement: Supplementary file 2 [file 8db065618677d834dc4564a4.docx]

**Table 1: Clinical, anthropometric and biological characteristics of patients with severe obesity before and after bariatric surgery**

| **Clinical parameters** | **Baseline** | **1 year-post surgery** | **P value**  **Baseline vs. 1 year** | **5 year-post surgery** | **P value 1 year vs. 5 years** | **P value Baseline vs. 5 years** |
| --- | --- | --- | --- | --- | --- | --- |
| Sample size, n | 132 | 130 |  | 89 | **-** |  |
| Age, years | 48.3 ± 0.1 | - |  | - | **-** |  |
| Sex (Female), n (%) | 105 (79.5) | - |  | - | **-** |  |
| Type of surgery n (%) |  |  |  |  |  |  |
| RYGB | 75 (56.8) | - |  | - | **-** |  |
| SG | 57 (43.2) | - |  | - | **-** |  |
| **Anthropometrics** | | | | | | | |
| Weight (kg) | 122.15 ± 0.04 | 86.20 ± 0.03 | **** | 90.90 ± 0.05 | ns | **** |
| BMI (kg/m2) | 44.3 ± 0.02 | 31.2 ± 0.02 | **** | 32.9 ± 0.03 | * | **** |
| Fat mass (%) | 48.18 ± 0.02 | 37.92 ± 0.02 | **** | 45.67 ± 0.09 (n=27) | **** | * |
| Fat-free mass (%) | 49.57 ± 0.02 | 58.96 ± 0.02 | **** | 53.14 ± 0.09 (n=27) | **** | *** |
|  |  |  |  |  |  |  |
| **Glucose homeostasis variables** | | | | | | | |
| Type 2 Diabetes, n (%) | 46 (35) | 15 (11) | **** | 10 (17) | **** | ** |
| Glucose Intolerance, n (%) | 47 (35) | 19 (15) | ns | 14 (25) | *** | ns |
| Metformin intake, n (%) | 35 (27) | 15 (12) | ** | 7 (12) | ns | * |
| Antidiabetic treatments (n) | 1.48 ± 0.02 | 0.54 ± 0.02 | **** | 0.70 ± 0.02 | ns | *** |
| Fasting glycemia (mmol/l) | 6.15 ± 0.01 | 4.98 ± 0.01 | **** | 5.48 ± 0.02 (n=56) | ns | ** |
| HbA1c (%) | 6.27 ± 0.01 | 5.59 ± 0.01 | **** | 5.69 ± 0.01 (n=59) | ns | ** |
| Fasting insulin (mUI/l) | 20.31 ± 0.03 | 6.44 ± 0.02 | **** | 8.58 ± 0.02 (n=54) | ns | **** |
| **Lipid homeostasis variables** | | | | | | | |
| Dyslipidemia n (%) | 108 (82) | 52 (39) | **** | 24 (41) | **** |  |
| Statins, n (%) | 32 (24) | 23 (18) | ns | 13 (22) | ns | ns |
| Total cholesterol (mmol/L) | 4.79 ± 0.01 | 4.48 ± 0.01 | * | 4.50 ± 0.02 (n=58) | ns | ns |
| Triglycerides (mmol/L) | 1.58 ± 0.01 | 1.99 ± 0.01 | **** | 1.10 ± 0.01 (n=59) | ns | *** |
| HDL-cholesterol (mmol/L) | 1.18 ± 0.03 | 1.52 ± 0.03 | **** | 1.48 ± 0.01 (n=56) | * | **** |
| LDL-cholesterol (mmol/L) | 2.87 ± 0.01 | 2.52 ± 0.01 | ** | 2.51 ± 0.02 (n=56) | ns | * |
| **Adipokines** | | | | | | | |
| Adiponectin (µg/ml) | 4.26 ± 0.01 | 6.38 ± 0.01 | **** | 4.93 ± 0.03 (n=55) | ns | ** |
| Leptin (mg/ml) | 67.81 ± 0.05 | 20.30 ± 0.04 | **** | 40.34 ± 0.12 (n=56) | *** | **** |
| **Inflammation** | | | | | | | |
| CRP (mg/L) | 8.22 ± 0.02 | 2.32 ± 0.01 | **** | 3.34 ± 0.02 (n=32) | ns | ** |
| IL6 (pg/ml) | 4.77 ± 0.02 | 3.26 ± 0.02 | ** | 2.87 ± 0.01 (n=55) | ns | *** |
| **Comorbidities** | | | | | | | |
| Hypertension, n (%) | 74 (56) | 56 (43) | * | 24 (41) | ns | ns |
| | Anti-hypertensive treatments (n) | 1,99±0,01 | 1,16±0,01 | **** | 0,69±0,001 | * | **** | | --- | --- | --- | --- | --- | --- | --- | | 1.99 ± 0.01 | 1.16 ± 0.01 | **** | 0.69 ± 0.001 | * | **** |
| OSA, n (%) | 97 (77) | 54 (42) | *** | 14 (24) | * | **** |
| CPAP, n (%) | 55 (56) | 24 (44) | *** | 6 (43) | ns | **** |
| **Psychological assessment** | | | | | | | |
| Reported ACEs, n (%) | 43 (33) | - |  | - | **-** |  |
| Depression, n (%) | 18 (14) | - |  | - | **-** |  |
| Depressive symptoms, n (%) | 41 (31) | - |  | - | **-** |  |
| Compulsive eating, n (%) | 30 (23) | - |  | - | **-** |  |

**Table 1: Clinical, anthropometric and biological characteristics of patients with severe obesity before and after bariatric surgery**

Data were collected at baseline and 1 and 5-years post-surgery. Results are expressed as mean (± SEM) for quantitative variables and as n (%) for qualitative variables. For quantitative variables, the Kruskal-Wallis or ANOVA tests were used, depending on the distribution of the variables. For qualitative variables, the Chi 2 test was used. RYGB: Roux-en-Y Gastric Bypass, SG: sleeve gastrectomy, BMI: Body Mass Index. OSA: Obstructive Sleep Apnea. CPAP: Continuous Positive Airway Pressure; ACEs: Adverse Childhood Experiences; non-significant ns P-value>0.05; * P-value ≤ 0.05; ** P-value ≤ 0.01; *** P-value ≤ 0.001; ****P-value ≤ 0.0001.
