# Supplementary material for: Severe Obesity, Psychopathologies, and Gut Microbiota: Insights into Bariatric Surgery Outcomes
Source: Research Square preprint supplement (doi:10.21203/rs.3.rs-6904293/v1), 2025-07-18
Supplement: Supplementary file 3 [file ea0a795eb9a59cbab220ed77.docx]

**Supplemental Table 1: patients’ characteristics according to the occurrence or absence of ACEs (n=132)**

| **Clinical parameters** | **ACEs** | **No ACEs** | **P value** |
| --- | --- | --- | --- |
| Sample size, n | 43 (33) | 88 (67) | - |
| Age, years | 45 (12.0) | 49.94±0.04 | * |
| Sex (Female), n (%) | 37 (86) | 68 (76) | ns |
| **Anthropometrics** | | | |
| Weight (kg) | 121.13±0.10 | 122.64±0.05 | ns |
| BMI (kg/m2) | 45.10±0.06 | 43.95±0.03 | ns |
| Fat mass (%) | 48.77±0.05 | 47.88±0.03 | ns |
| Fat-free mass (%) | 49.07±0.05 | 49.83±0.03 | ns |
| **Glucose homeostasis variables** | | | |
| Type 2 Diabetes, n (%) | 18 (42) | 28 (31) | ns |
| Glucose Intolerance, n (%) | 9 (21) | 38 (43) | * |
| Metformin, n (%) | 12 (67) | 19 (68) | ns |
| Insulin, n (%) | 5 (28) | 6 (21) | ns |
| HbA1c (%) | 6.36±0.02 | 6.23±0.01 | ns |
| **Lipid homeostasis variables** | | | |
| Dyslipidemia, n (%) | 36 (84) | 72 (81) | ns |
| Statins, n (%) | 9 (25) | 23 (32) | ns |
| Total cholesterol (mmol/L) | 4.73±0.02 | 4.77±0.01 | ns |
| Triglycerides (mmol/L) | 1.66±0.03 | 1.54±0.01 | ns |
| HDL-cholesterol (mmol/L) | 1.14±0.01 | 1.19±0.01 | ns |
| LDL-cholesterol (mmol/L) | 2.87±0.02 | 2.88±0.01 | ns |
| **Other comorbidities** | | | |
| **Hypertension, n (%)** | 26 (60) | 48 (54) | ns |
| 1 Anti-hypertensive treatment, n (%) | 8 (31) | 20 (42) | ns |
| ≥ 2 Anti-hypertensive treatments, n (%) | 16 (62) | 27 (56) | ns |
| **OSA, n (%)** | 32 (74) | 66 (74) | ns |
| CPAP, n (%) | 17 (53) | 38 (58) | ns |
| **Adipokines** | | | |
| Adiponectin (µg/ml) | 4.20±0.04 | 4.29±0.02 | ns |
| Leptin (mg/ml) | 64.51±014 | 69.39±0.08 | ns |
| **Inflammation** | | | |
| CRP us (mg/L) | 8.10±0.06 | 8.33±0.03 | ns |
| Fibrinogen (g/L) | 4.40±0.02 | 4.27±0.01 | ns |
| IL6 (pg/ml) | 5.32±0.05 | 4.52±0.02 | ns |
| **Psychological assessment** | | | |
| Depression, n (%) | 7 (16) | 11 (12) | ns |
| Depressive symptoms, n (%) | 19 (44) | 22 (24) | * |
| No symptoms, n (%) | 17 (40) | 56 (63) | ns |
| Compulsive eating, n (%) | 13 (30) | 17 (19) | ns |

Results are expressed as mean (± SD) for quantitative variables and as n (%) for qualitative variables. For quantitative variables, the Kruskal-Wallis or ANOVA tests were used, depending on the distribution of the variables. For qualitative variables, the Chi 2 test was used. BMI: Body Mass Index. OSA: Obstructive Sleep Apnea; CPAP: continuous positive airway pressure, ACEs: Adverse Childhood Experiences; ns: P-value>0.05; * P-value ≤ 0.05; ** P-value ≤ 0.01; *** P-value ≤ 0.001; ****P-value ≤ 0.0001.
